# Supplementary material for: From Patient-Controlled Analgesia to Artificial Intelligence-Assisted Patient-Controlled Analgesia: Practices and Perspectives
Source: PubMed Central journal article supplement (PMC7326064; doi:10.3389/fmed.2020.00145), 2020-05-22
Supplement: Image_1.pdf [file Image_1.pdf]

**Figure S1**

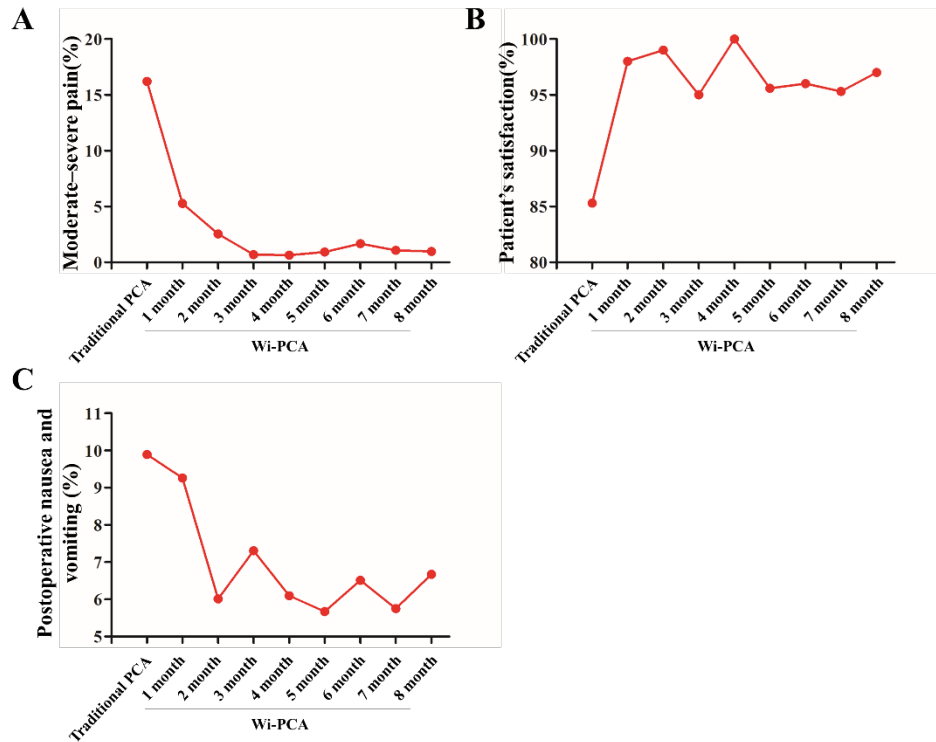

**Figure S1. Effect of Wi-PCA on pain, patient satisfaction and PONV after surgery. A.** Wi-PCA significantly reduce the incidence of moderate or severe pain after surgery. **B.** Wi-PCA significantly improve patient satisfaction for pain relief after surgery. **C.** Wi-PCA decrease incidence of postoperative nausea and vomiting (PONV) after surgery
